# Supplementary material for: Social Restrictions versus Testing Campaigns in the COVID-19 Crisis: A Predictive Model Based on the Spanish Case
Source: MDPI journal article supplement (doi:10.3390/v13050917), 2021-05-15
Supplement: s1 [file s1]

## **Social restrictions versus testing campaigns in the COVID-19 crisis: a predictive model based on the Spanish case. Supplementary material**

### **Content:**

Figure S1: Patient flow between epidemiological compartments

Figure S2: Contact matrix adjusted by age group

Figure S3: Correlation between epidemiological variables and economic impact

Table S1: Epidemiological model parameters and characterization

Table S2: Parameters adjusted by age group

Table S3: One-way sensitivity analysis of hospitalization rate

Table S4: One-way sensitivity analysis of face-to-face primary care visits

Table S5: Unitary costs

Table S6: Estimated coefficients of the regression model.

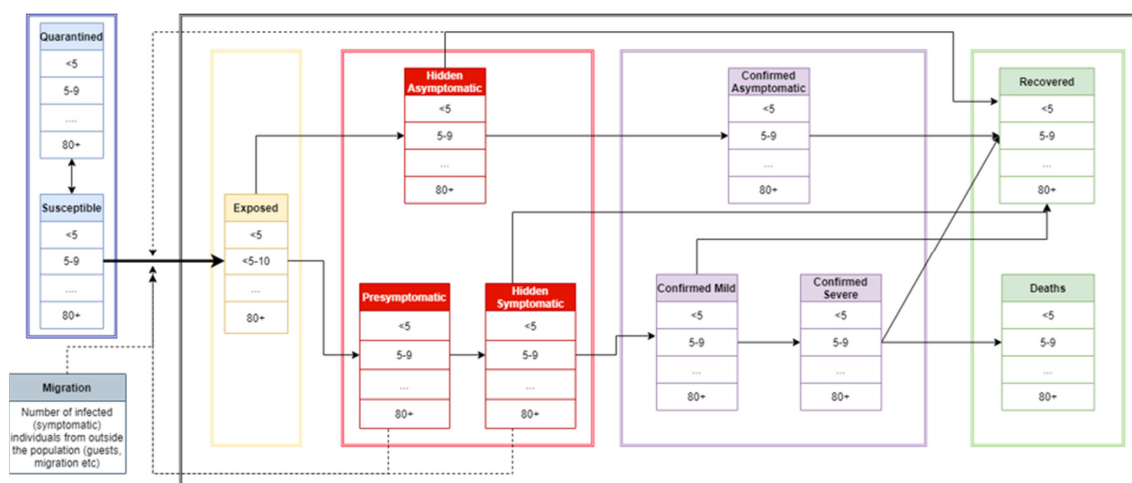

Figure S1. Patient flow between epidemiological compartments

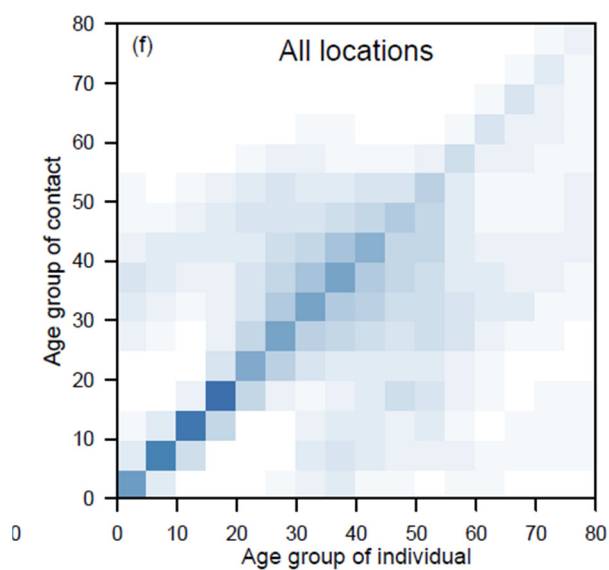

Figure S2. Contact matrix adjusted by age group

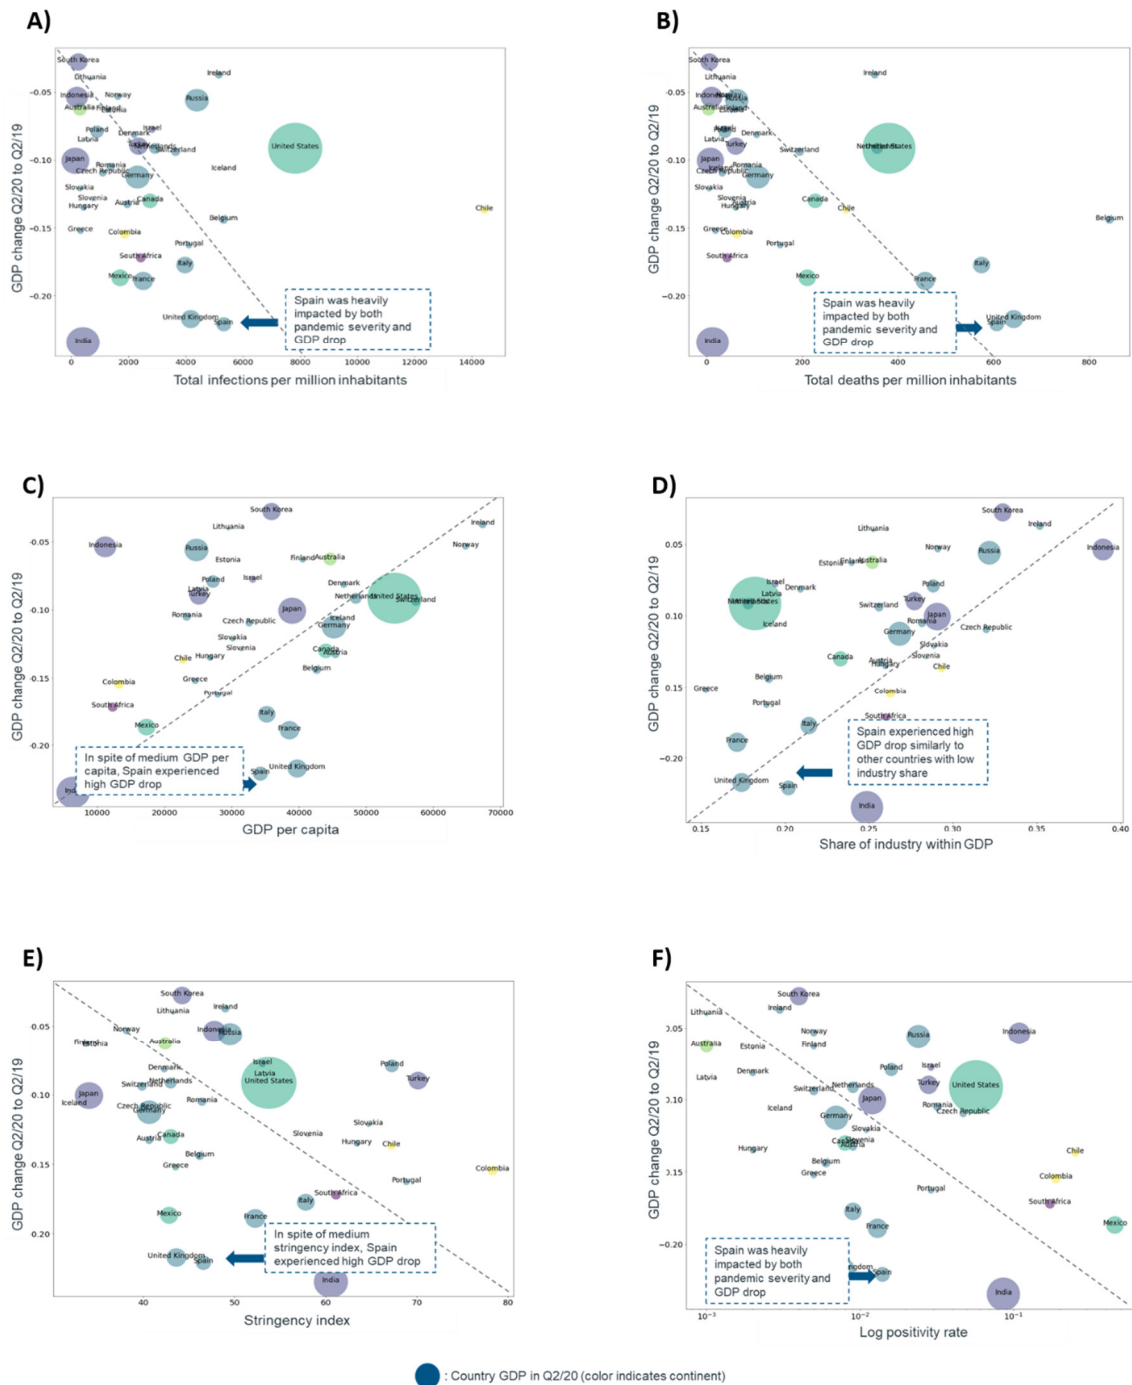

**Figure S3. Correlation between epidemiological variables and economic impact**

Note: A) Higher pandemic severity in terms of total infections per million inhabitants is related to higher GDP drop; B) Higher pandemic severity in terms of total deaths per million inhabitants is related to higher GDP drop; C) Higher GDP per capita is related to lower GDP drop; D) Higher share of industry is related to lower GDP drop; E) Higher stringency index (lockdown policy), is related to higher GDP drop.

**Table S1.** Epidemiological model parameters and characterization

| Compartment | Definition                                                                                                           | Key parameter (transition rate)                                                                                                                                  |       |                                                                                                  | Rationale from transition to next compartment                                                                                                                                                                                           |
|-------------|----------------------------------------------------------------------------------------------------------------------|------------------------------------------------------------------------------------------------------------------------------------------------------------------|-------|--------------------------------------------------------------------------------------------------|-----------------------------------------------------------------------------------------------------------------------------------------------------------------------------------------------------------------------------------------|
|             |                                                                                                                      | Parameter                                                                                                                                                        | Value | Source                                                                                           |                                                                                                                                                                                                                                         |
| Susceptible | Individuals who are potential to contract the disease if they come in contact with an infected individual            | $\beta_a$ : probability of transmission during single contact with asymptomatic person                                                                           | 0.002 | Fitted to data, from range [0.0001, 0.05]                                                        | We estimate average number of contacts per day starting with Contact Matrix, then reduce it based on Stringency Index<br>Afterwards, we multiply the number of contacts by size of hidden group and beta to determine the newly exposed |
|             |                                                                                                                      | $\beta_{pre}$ : probability of transmission during a single contact with pre-symptomatic person                                                                  | 0.186 | Fitted to data from range [0.01, 0.2]                                                            |                                                                                                                                                                                                                                         |
|             |                                                                                                                      | $\beta_s$ : probability of transmission during a single contact with symptomatic person                                                                          | 0.01  | Fitted to data from range [0.01, 0.2]                                                            |                                                                                                                                                                                                                                         |
|             |                                                                                                                      | <i>Age immunity</i> : adjustment to beta based on age of susceptible individual                                                                                  |       | Constant adjustment estimated to have correct age group promotion in new cases                   |                                                                                                                                                                                                                                         |
|             |                                                                                                                      | <i>Season adjustment</i> : adjustment to beta based on season; bigger transition on winter                                                                       | -0.23 | Fitted to data from range [-1; 1]                                                                |                                                                                                                                                                                                                                         |
| Exposed     | Individuals who are in the incubation phase. They will return negative if tested, and are not transmitting the virus | $E \rightarrow H$ : constant share of exposed who transition to the hidden stage<br><i>Asymptomatic by age</i> : probability of developing the symptoms by age   | 0.18  | Fitted to data from range [0.15; 0.6]                                                            | After 1/E->H days (on average) from infection, the individual finishes incubation. Probability of being symptomatic depends upon age                                                                                                    |
| Hidden      | Hidden Asymptomatic                                                                                                  | $H_A \rightarrow R$ : constant share of asymptomatic is moved to recovered                                                                                       | 0.077 | Fitted to data from range [0.07, 0.5]                                                            | We estimate testing pool size (the faster development spread, the bigger), then randomly choose who from that pool would be tested<br><br>If the individual is not confirmed after 1/H_A->R number of days it would become recovered    |
|             |                                                                                                                      | <i>Testing pool size</i> : estimation of people that are target to be tested. Depends on new confirmed group from previous day                                   | 21    | Number of contacts of new confirmed (NC)*pool_modifier                                           |                                                                                                                                                                                                                                         |
|             |                                                                                                                      | <i>Test number</i> : absolute number of tests executed each day                                                                                                  |       | Historical: based on data<br>Modelling: estimated based on provided tests per case value by user |                                                                                                                                                                                                                                         |
|             |                                                                                                                      | <i>Test sensitivity</i> : proportion of correctly identified positives                                                                                           | 0.96  | Historical: based on test ratio<br>Modelling: provided by user                                   |                                                                                                                                                                                                                                         |
|             | Hidden Pre-symptomatic                                                                                               | $H_{pre} \rightarrow H_S$ : constant share of pre-symptomatic is moved to symptomatic<br><i>testing_pool_size</i> , <i>test_number</i> , <i>test sensitivity</i> | 0.363 | Fitted to data from range [0.2, 1]                                                               | We estimate testing pool size (the faster development spread, the bigger), then randomly choose who from that pool would be tested<br><br>If the individual is not confirmed after 1-2 days, it would become symptomatic                |

|                  |                           |                                                                                                                                                               |                                                                                                                                |       |                                                                         |                                                                                         |
|------------------|---------------------------|---------------------------------------------------------------------------------------------------------------------------------------------------------------|--------------------------------------------------------------------------------------------------------------------------------|-------|-------------------------------------------------------------------------|-----------------------------------------------------------------------------------------|
|                  | <b>Hidden Symptomatic</b> | Individuals who are infected, not detected and have developed symptoms. They are transmitting the virus with a slightly smaller rate than pre-symptomatic     | $H\_S \rightarrow C\_M$ : constant share of asymptomatic is moved to confirmed testing_pool_size, test_numer, test sensitivity | 0.329 | Fitted to data from range [0.1, 1]                                      | Certain share of symptomatic would be diagnosed each day (even without testing)         |
| <b>Confirmed</b> | <b>Asymptomatic</b>       | Asymptomatic individuals who were tested positively and are isolated. We assume that isolation is strict, so they are no longer spreading                     | $C\_A \rightarrow R$ : constant share of asymptomatic confirmed are moved into recovered                                       | 0.07  | Constant based on quarantine time                                       | After quarantine is over, individuals are moved into recovered                          |
|                  | <b>Mild</b>               | Individuals confirmed with COVID-19, who are symptomatic or are about to be symptomatic, but do not need hospitalization. They are isolated and not spreading | $C\_M \rightarrow R^*$ : constant share of confirmed mild is moved into recovered                                              | 0.07  | Constant based on quarantine time                                       | Confirmed mild eventually get better and get removed, or get worse and are hospitalized |
|                  |                           |                                                                                                                                                               | $C\_M \rightarrow C\_S^*$ : constant share of confirmed mild is moved into severe                                              | 0.037 | Constant based on hospitalization vs confirmed rate                     |                                                                                         |
|                  | <b>Severe</b>             | Individuals confirmed with COVID-19 who are hospitalized. They are not spreading                                                                              | $C\_S \rightarrow R^*$ : constant share of confirmed that are released                                                         | 0.02  | Constant based on average time from hospitalization to fully recovered. | When individual leaves the hospital or passes away, they are moved to removed group     |
|                  |                           |                                                                                                                                                               | $C\_S \rightarrow D^*$ : constant share of population that doesn't survive.                                                    | 0.009 | Constant based on total death to hospitalization ratio                  |                                                                                         |
| <b>Removed</b>   | <b>Recovered</b>          | Individuals who are done with the infection and are no longer quarantined. They developed resistance they will be tested negatively                           | -                                                                                                                              | -     | -                                                                       | -                                                                                       |
|                  | <b>Death</b>              | Individuals who didn't survive the infection                                                                                                                  | -                                                                                                                              | -     | -                                                                       | -                                                                                       |

**Table S2.** Parameters adjusted by age group

| Age group | % of asymptomatic | Sensitivity adjustment |
|-----------|-------------------|------------------------|
| 0 to 4    | 0.9               | 0.1                    |
| 5 to 9    | 0.9               | 0.1                    |
| 10 to 14  | 0.83              | 0.1                    |
| 15 to 19  | 0.76              | 0.2                    |
| 20 to 24  | 0.69              | 0.33                   |
| 25 to 29  | 0.62              | 0.4                    |
| 30 to 34  | 0.55              | 0.5                    |
| 35 to 39  | 0.48              | 0.6                    |
| 40 to 44  | 0.41              | 0.7                    |
| 45 to 49  | 0.34              | 0.8                    |
| 50 to 54  | 0.27              | 0.9                    |
| 55 to 59  | 0.2               | 1.0                    |
| 60 to 64  | 0.2               | 1.1                    |
| 65 to 69  | 0.2               | 1.2                    |
| 70 to 74  | 0.2               | 1.3                    |
| 75 to 79  | 0.2               | 1.4                    |
| 80+       | 0.2               | 1.5                    |

**Table S3.** One-way sensitivity analysis of hospitalization rate

| Change        | % hosp. | Epidemiological outputs |        |        | Economic outputs |          |             |
|---------------|---------|-------------------------|--------|--------|------------------|----------|-------------|
|               |         | Hosp.                   | ICU    | Deaths | Hosp.            | ICU      | Total costs |
| -20% $\Delta$ | 4,64%   | 70.933                  | 7.058  | 14.941 | 403,4 M€         | 278,1 M€ | 1.613,4 M€  |
| = $\Delta$    | 5,80%   | 88.666                  | 8.822  | 18.676 | 504,3 M€         | 347,6 M€ | 1.783,7 M€  |
| +20% $\Delta$ | 6,96%   | 106.399                 | 10.586 | 22.411 | 605,2 M€         | 417,1 M€ | 1.954,1 M€  |

Note: only showing parameters affected by a change on hospitalization rate. All other outputs remain the same as the base case.

**Table S4.** One-way sensitivity analysis of face-to-face primary care visits

| Change        | % face-to-face visits | Economic outputs |             |
|---------------|-----------------------|------------------|-------------|
|               |                       | PC               | Total costs |
| -20% $\Delta$ | 40,0%                 | 130,9 M€         | 1.773,9 M€  |
| = $\Delta$    | 50,0%                 | 140,7 M€         | 1.783,7 M€  |
| +20% $\Delta$ | 60,0%                 | 150,5 M€         | 1.793,6 M€  |

Note 1: non-face-to-face primary care visits were computed as consultations over the phone.

Note 2: only parameters affected by a change on face-to-face primary care visits rate are displayed.

**Table S5.** Unitary costs

| Input                                                                                          | Unit cost (€) | Source               |
|------------------------------------------------------------------------------------------------|---------------|----------------------|
| Individual molecular test assay                                                                | 18.00         | Grifols data on file |
| 8-pooling TMA test assay                                                                       | 10.80         |                      |
| Total individual molecular test (including logistics, healthcare professional and other costs) | 31.42         |                      |
| Total 8-pooling TMA test (including logistics, healthcare professional and other costs)        | 21.88         |                      |
| Hospitalization, per day                                                                       | 546.88        | MSCBS [1]            |
| Intensive Care Unit hospitalization, per day                                                   | 1,713.00      | eSalud [2]           |
| Telephone General Practitioner visit                                                           | 28.00         | eSalud [2]           |
| Face to Face General Practitioner visit                                                        | 58.00         | eSalud [2]           |

1. Ministerio de Sanidad Consumo y Bienestar Social (MSCBS). Portal Estadístico. Registro de Atención Especializada (RAE-CMBD) [Internet] <https://pestadistico.inteligenciadegestion.mscbs.es/publicoSNS/Comun/ArbolNodos.aspx?idNodo=23606>
2. Consulting O. eSalud - Información económica del sector sanitario. 2020 [Internet] <http://esalud.oblikue.com/>

**Table S6.** Estimated coefficients of the regression model

| Dependent variable | R-squared | F-statistic | Condition number |  |
|--------------------|-----------|-------------|------------------|--|
| GDP change         | 0.533     | 9.986       | 1,370            |  |

  

| Variable                      | Coefficient | Standard error | P-value | VIF   |
|-------------------------------|-------------|----------------|---------|-------|
| Positivity rate               | -0.2202     | -0.3653        | 0.006   | 1.33  |
| Case fatality rate            | -0.4301     | -0.3780        | 0.004   | 2.40  |
| Industry share over total GDP | 0.3766      | 0.3899         | 0.005   | 13.19 |
| Stringency Index              | -0.0011     | -0.2338        | 0.059   | 11.74 |
